# Supplementary material for: Use of System Dynamics Modelling for Evidence-Based Decision Making in Public Health Practice
Source: MDPI journal article supplement (doi:10.3390/systems11050247), 2023-05-14
Supplement: s1 [file s1]

## Supplementary Material

**Supplementary Table S1: Data inputs and sources [17-27]**

| Source                                                                   | Information                                          | Detail                                                                                                                                 |
|--------------------------------------------------------------------------|------------------------------------------------------|----------------------------------------------------------------------------------------------------------------------------------------|
| <b>Kent Household population projections, 2001-2037</b>                  | Population data                                      | Household population, migration and death estimates and projections: counts by age, sex, and local authority                           |
| <b>ONS annual deaths, 2001-2016</b>                                      | Deaths                                               | counts by age, cause of death, sex, and local authority                                                                                |
| <b>KiD</b>                                                               | Number of A&E attendances                            | counts by cohort, age group and CCG                                                                                                    |
|                                                                          | Number of patients admitted to hospital (emergency)  | counts by cohort, age group and CCG                                                                                                    |
|                                                                          | Number of GP appointments                            | counts by cohort, age group and CCG                                                                                                    |
|                                                                          | Number people supported by domiciliary care          | counts by cohort, age group and CCG                                                                                                    |
|                                                                          | Number of people resident in a residential care home | counts by cohort, age group and CCG                                                                                                    |
|                                                                          | Number of people resident in a nursing home          | counts by cohort, age group and CCG                                                                                                    |
| <b>Health Survey for England - 1999-2014</b>                             | Lipid-lowering drugs                                 | Prevalence of never having had angina or heart attack and currently taking lipid lowering drugs prescribed by a doctor                 |
|                                                                          | Hypertension treatment                               | Prevalence of never having had angina or heart attack currently taking medication specifically prescribed to treat high blood pressure |
|                                                                          | Smoking cessation                                    | Prevalence healthy and a current smoker                                                                                                |
|                                                                          | Weight management                                    | Prevalence healthy and overweight or obese                                                                                             |
| <b>General Lifestyle Survey and General Household Survey – 2005-2017</b> | Alcohol consumption                                  | Prevalence mean weekly alcohol consumption, None, low, hazardous or harmful                                                            |
| <b>NHS England</b>                                                       | Breastfeeding initiation                             | Breast feeding initiation percent (2013/14, 2014/15 & 2015/16 average)                                                                 |
|                                                                          | Smoking during pregnancy                             | Smoking during pregnancy percent (2014/15, 2015/16 & 2016/17 average)                                                                  |
| <b>National Child Measurement Programme,</b>                             | Child Obesity                                        | Child obesity prevalence, 11 year olds (2012/13 to 2015/16 average)                                                                    |

|                                                                       |                                      |                                                                                                                       |
|-----------------------------------------------------------------------|--------------------------------------|-----------------------------------------------------------------------------------------------------------------------|
| <b>IMD 2010 (Index of Deprivation Affecting Children 0-15 years)</b>  | Fuel Poverty                         | Percent of children classed as living in child poverty (proxy for fuel poverty)                                       |
| <b>Millennium Cohort Study, 2017</b>                                  | Adverse Childhood Experiences (ACE)* | Percent of children with 1+ ACE (indirect), age groups and Percent of children with 3+ ACE (indirect / direct), at 15 |
| <b>Health Survey for England (HSfE) - 1999-2009</b>                   | Current cigarette smoking            | Self-reported status                                                                                                  |
|                                                                       | SBP (mmHg)                           | Mean SBP from 2nd and 3rd reading                                                                                     |
|                                                                       | Body Mass Index                      | Valid height and weight measurements                                                                                  |
|                                                                       | Total cholesterol (mmol/l)           | Those reporting taking lipid lowering drugs were included                                                             |
| <b>Health Survey for England (HSfE) - 1999-2004, 2006, 2008, 2009</b> | Physical inactivity                  | Low or no activity levels                                                                                             |
| <b>Health Survey for England (HSfE) - 2005-2017</b>                   | Alcohol consumption                  | Self-reported status                                                                                                  |

**Supplementary Table S2: Children and young people cohort definitions**

| <b>Segmentation Cohort</b> | <b>Long-term conditions</b>  | <b>Definition</b>                                                                                                                       | <b>KID definition</b>                                                                           |
|----------------------------|------------------------------|-----------------------------------------------------------------------------------------------------------------------------------------|-------------------------------------------------------------------------------------------------|
| Health Conditions          | Enduring physical health     | Cystic Fibrosis, Cerebral Palsy, Other disorders of the nervous system, Diabetes Type 1, Epilepsy, Spina Bifida, Chronic Kidney Disease | Cerebral_Palsy, Parkinsons, Carpal_Tunnel_Syndrome, MS, Diabetes1, Eplisepsy, Spina_Bifida, CKD |
|                            | Enduring mental health       | Schizophrenia, Psychoses, Bipolar                                                                                                       | MH, OCD, Tourette                                                                               |
|                            | Non-enduring physical health | Cancers, Cardiac, Asthma                                                                                                                | Cancers, Cardiac, Asthma                                                                        |
|                            | Non-enduring mental health   | Mild Depression, Anxiety, Eating Disorder                                                                                               | Anorexia_Bulimia, Depression, Anxiety                                                           |
|                            | Learning disability          | Downs Syndrome, other learning disability                                                                                               | Chromosome_inc_Downs, LD                                                                        |
|                            | ADHD                         | ADHD                                                                                                                                    | ADHD                                                                                            |
|                            | Autism                       | Autism                                                                                                                                  | ASD                                                                                             |
| Healthy                    | None of the above            | None of the above                                                                                                                       | None of the above                                                                               |

**Supplementary Table S3: Adult cohort definitions**

| <b>Segmentation Cohort</b>            | <b>Cohort group</b>                        | <b>Long-term conditions</b>           | <b>Definition</b>                                                                                                                                | <b>KID definition</b>                                         |
|---------------------------------------|--------------------------------------------|---------------------------------------|--------------------------------------------------------------------------------------------------------------------------------------------------|---------------------------------------------------------------|
| Severe frailty                        | Severe frailty                             | Severe frailty                        | Electronic frailty index severe frailty (eFi:>0.36)                                                                                              | Electronic Frailty Index severe frailty (Frailty index > 2)   |
| Multiple conditions and complex needs | Single conditions with high levels of need | Serious Mental Illness                | Schizophrenia, psychoses, bipolar                                                                                                                | MH                                                            |
|                                       |                                            | Severe Learning Disability            | Learning disability                                                                                                                              | LD                                                            |
|                                       |                                            | Dementia                              | Diagnosed Dementia                                                                                                                               | Dementia                                                      |
|                                       |                                            | Neurological Conditions               | Diagnosed Parkinsons                                                                                                                             | Parkinsons                                                    |
|                                       | Multiple conditions                        | Multiple conditions                   | 2 or more of the single condition health cohorts, but excluding people already identified as severely frail or with a high need single condition |                                                               |
|                                       |                                            |                                       |                                                                                                                                                  |                                                               |
| Single Conditions                     | Single Conditions                          | Asthma                                | QoF definition                                                                                                                                   | Asthma                                                        |
|                                       |                                            | Coronary Heart Disease                | QoF definition                                                                                                                                   | CHD                                                           |
|                                       |                                            | Chronic Obstructive Pulmonary Disease | QoF definition                                                                                                                                   | COPD                                                          |
|                                       |                                            | Type 2 Diabetes                       | QoF definition                                                                                                                                   | Diabetes2                                                     |
|                                       |                                            | Heart Failure                         | QoF definition                                                                                                                                   | HF                                                            |
|                                       |                                            | Stroke                                | QoF definition                                                                                                                                   | Stroke                                                        |
|                                       |                                            | Moderate frailty                      | Electronic Frailty Index moderate frailty (eFi: 0.24-0.36)                                                                                       | Electronic Frailty Index moderate frailty (Frailty index < 2) |
| Healthy                               | Healthy                                    | Healthy                               | None of the above                                                                                                                                | None of the above                                             |

**Supplementary Table S4: Prevalence of Children and Young people long-term conditions (2017) [17]**

| Cohorts                            | Age group (years) |      |       |       |       |       |
|------------------------------------|-------------------|------|-------|-------|-------|-------|
|                                    | 0-1               | 2-4  | 05-10 | 11-15 | 16-17 | 18-24 |
| <b>Healthy</b>                     | 99.9              | 98.4 | 93.9  | 88.5  | 85.9  |       |
| <b>ADHD</b>                        | 0.0               | 0.0  | 0.1   | 0.3   | 0.3   |       |
| <b>Autism</b>                      | 0.0               | 0.1  | 0.5   | 0.6   | 0.4   |       |
| <b>Mental Health Not Enduring</b>  | 0.0               | 1.1  | 4.5   | 7.8   | 8.8   |       |
| <b>Physical Not Enduring</b>       | 0.0               | 0.0  | 0.2   | 1.2   | 2.8   |       |
| <b>LD</b>                          | 0.0*              | 0.0* | 0.0*  | 0.1   | 0.2   | 0.4   |
| <b>Mental Health Enduring</b>      | 0.1               | 0.2  | 0.3   | 0.3   | 0.4   | 0.3   |
| <b>Enduring physical condition</b> | 0.0               | 0.2  | 0.6   | 0.9   | 1.2   | 1.4   |

**Supplementary Table S5: Prevalence of Adult long-term conditions (2012) [17, 31]**

|                             | <b>Age groups (years)</b>                                             |              |              |              |              |            |
|-----------------------------|-----------------------------------------------------------------------|--------------|--------------|--------------|--------------|------------|
| <b>Cohorts</b>              | <b>18-49</b>                                                          | <b>50-59</b> | <b>60-64</b> | <b>65-74</b> | <b>75-84</b> | <b>85+</b> |
| <b>Healthy</b>              | 89.6                                                                  | 76.8         | 70.2         | 58.8         | 43.2         | 31.8       |
| <b>Asthma</b>               | 7.0                                                                   | 8.5          | 7.0          | 6.3          | 4.1          | 2.9        |
| <b>CHD</b>                  | 0.2                                                                   | 1.6          | 3.0          | 5.2          | 8.3          | 5.6        |
| <b>COPD</b>                 | 0.2                                                                   | 1.1          | 2.3          | 1.7          | 1.4          | 1.0        |
| <b>Diabetes type 2</b>      | 1.0                                                                   | 3.9          | 5.7          | 5.5          | 5.3          | 4.6        |
| <b>HF</b>                   | Contained within higher order cohorts, e.g. multiple and severe frail |              |              |              |              |            |
| <b>Stroke</b>               | 0.1                                                                   | 0.5          | 1.0          | 1.7          | 2.9          | 2.1        |
| <b>Moderately Frail</b>     | 0.0                                                                   | 1.8          | 2.2          | 2.6          | 5.2          | 6.0        |
| <b>Multiple LTC</b>         | 0.9                                                                   | 4.3          | 6.6          | 8.7          | 12.7         | 11.8       |
| <b>Severe mental health</b> | 0.6                                                                   | 0.8          | 0.5          | 0.2          | 0.0          | 0.0        |
| <b>Neuro</b>                | 0.0                                                                   | 0.1          | 0.7          | 0.4          | 0.9          | 0.2        |
| <b>Dementia</b>             | 0.0                                                                   | 0.3          | 0.5          | 0.4          | 1.7          | 1.9        |
| <b>LD</b>                   | 0.3                                                                   | 0.3          | 0.3          | 0.2          | 0.1          | 0.0        |
| <b>Severe Frail</b>         | 0.0                                                                   | 0.0          | 0.0          | 8.5          | 14.2         | 32.2       |

**Supplementary Table S6: Adult percentage prevalence of single condition long-term conditions within multiple and frail cohorts (2012) [31]**

| <b>Cohort</b>               | <b>Multiple conditions</b> | <b>Frail</b> |
|-----------------------------|----------------------------|--------------|
| <b>Asthma</b>               | 43.8                       | 4.5          |
| <b>CHD</b>                  | 40.1                       | 6.9          |
| <b>COPD</b>                 | 35.1                       | 4.4          |
| <b>Type 2 Diabetes</b>      | 40.4                       | 8.1          |
| <b>Heart Failure</b>        | 4.8                        | 0.6          |
| <b>Stroke</b>               | 25.9                       | 8.0          |
| <b>Frail moderate</b>       | 38.5                       | 25.3         |
| <b>Severe mental health</b> | 0.0                        | 0.5          |
| <b>Parkinsons</b>           | 0.0                        | 4.5          |
| <b>Dementia</b>             | 0.0                        | 12.2         |

**Supplementary Table S7: Incidence per 1000 population age 18 and over (2017)**

| Cohort CYP        | Incidence, rate per 1000, age group (years) |      |      |      |       |       |       |
|-------------------|---------------------------------------------|------|------|------|-------|-------|-------|
|                   | 0                                           | 0-1  | 2-4  | 5-10 | 11-15 | 16-17 | 18-24 |
| From healthy      | 0.09                                        | 0.09 | 0.11 | 0.10 | 0.11  | 0.11  | 0.07  |
| Health conditions |                                             |      |      |      |       |       |       |
| From healthy      | 0.00                                        | 0.05 | 0.41 | 0.68 | 0.85  | 1.62  | 0.55  |



**Supplementary Table S8: Incidence and mortality rates per 1000 population age 18 and over (2012) [17, 31]**

| <b>Cohort</b>               | <b>Healthy to cohort</b> | <b>Single to multiple</b> | <b>Frail to severe</b> | <b>Death rate</b> |
|-----------------------------|--------------------------|---------------------------|------------------------|-------------------|
| <b>Healthy</b>              | 0.0                      | 0.5                       | 2.0                    | 4.0               |
| <b>Asthma</b>               | 1.5                      | 10.7                      | 2.4                    | 3.7               |
| <b>CHD</b>                  | 1.6                      | 25.3                      | 8.0                    | 24.0              |
| <b>COPD</b>                 | 1.1                      | 43.6                      | 25.8                   | 36.9              |
| <b>Diabetes type 2</b>      | 2.2                      | 33.6                      | 10.3                   | 14.5              |
| <b>HF</b>                   | 0.0                      | 0.0                       | 0.0                    | 0.0               |
| <b>Stroke</b>               | 1.0                      | 58.3                      | 22.9                   | 23.0              |
| <b>Moderately Frail</b>     | 2.1                      | 8.5                       | 54.2                   | 50.7              |
| <b>Multiple LTC</b>         | 4.1                      |                           | 38.9                   | 37.3              |
| <b>Severe mental health</b> | 0.1                      |                           | 10.5                   | 8.0               |
| <b>Neuro</b>                | 0.3                      |                           | 47.6                   | 64.3              |
| <b>Dementia</b>             | 0.6                      |                           | 65.6                   | 73.8              |
| <b>LD</b>                   | from CYP model           |                           | 8.0                    |                   |
| <b>Severe Frail</b>         |                          |                           |                        | 140.1             |

**Supplementary Table S9: Cause of death percent aged 50 and over (2012) [31]**

| <b>Cohort</b>               | <b>Cause of death (%)</b> |            |                    |              |
|-----------------------------|---------------------------|------------|--------------------|--------------|
|                             | <b>Cancer</b>             | <b>CVD</b> | <b>Respiratory</b> | <b>Other</b> |
| <b>Healthy</b>              | 40.7                      | 25.5       | 7.3                | 26.5         |
| <b>Asthma</b>               | 41.7                      | 33.3       | 8.3                | 16.7         |
| <b>CHD</b>                  | 31.0                      | 45.2       | 3.6                | 20.2         |
| <b>COPD</b>                 | 0.0                       | 71.4       | 28.6               | 0.0          |
| <b>Diabetes type 2</b>      | 48.3                      | 20.0       | 8.3                | 23.3         |
| <b>Heart failure</b>        | 0.0                       | 0.0        | 0.0                | 0.0          |
| <b>Stroke</b>               | 50.0                      | 12.5       | 25.0               | 12.5         |
| <b>Moderate frailty</b>     | 8.8                       | 28.4       | 42.2               | 20.6         |
| <b>Multiple LTC</b>         | 25.9                      | 36.1       | 17.0               | 21.0         |
| <b>Severe mental health</b> | 100.0                     | 0.0        | 0.0                | 0.0          |
| <b>Parkinson's</b>          | 16.7                      | 0.0        | 0.0                | 83.3         |
| <b>Dementia</b>             | 12.5                      | 26.8       | 0.0                | 60.7         |
| <b>Frail severe</b>         | 19.5                      | 25.9       | 20.0               | 34.6         |
| <b>All persons</b>          | 28.3                      | 29.3       | 14.3               | 28.1         |

**Supplementary Table S10: ONS Mortality by main cause of death (2012) [19]**

| <b>Age group</b> | <b>CVD</b> | <b>Cancer</b> | <b>Respiratory</b> | <b>Other</b> | <b>Total</b> | <b>Percent</b> |
|------------------|------------|---------------|--------------------|--------------|--------------|----------------|
| <b>15-24</b>     | 0          | 0             | 0                  | 15           | 15           | 0%             |
| <b>25-34</b>     | 0          | 0             | 0                  | 18           | 18           | 0%             |
| <b>35-44</b>     | 6          | 34            | 0                  | 55           | 95           | 1%             |
| <b>45-54</b>     | 79         | 199           | 6                  | 142          | 426          | 3%             |
| <b>55-64</b>     | 215        | 484           | 61                 | 200          | 960          | 7%             |
| <b>65-74</b>     | 570        | 963           | 253                | 328          | 2114         | 16%            |
| <b>75-84</b>     | 1170       | 1254          | 587                | 873          | 3884         | 30%            |
| <b>85+</b>       | 1837       | 915           | 1036               | 1849         | 5637         | 43%            |
| <b>Total</b>     | 3877       | 3849          | 1943               | 3480         | 13149        | 100%           |
| <b>Percent</b>   | 29%        | 29%           | 15%                | 26%          | 100%         |                |

**Supplementary Table S11: Adult percentage prevalence of long-term conditions by social grade (2012) [31]**

| Cohorts                     | Prevalence by social grade |         |       |                       |                |                  |
|-----------------------------|----------------------------|---------|-------|-----------------------|----------------|------------------|
|                             | DE                         | Average | Diff  | Diff social class adj | Prevalence adj | Prevalence ratio |
| <b>Healthy</b>              | 55.84                      | 63.11   | -7.27 | 1.40                  | 64.51          | 1.02             |
| <b>Asthma</b>               | 6.25                       | 5.96    | 0.30  | -0.06                 | 5.90           | 0.99             |
| <b>CHD</b>                  | 4.24                       | 3.94    | 0.30  | -0.06                 | 3.88           | 0.99             |
| <b>COPD</b>                 | 1.95                       | 1.53    | 0.42  | -0.08                 | 1.44           | 0.95             |
| <b>Diabetes type 2</b>      | 6.40                       | 5.45    | 0.95  | -0.18                 | 5.27           | 0.97             |
| <b>HF</b>                   | 0.03                       | 0.04    | -0.01 | 0.00                  | 0.04           | 1.00             |
| <b>Stroke</b>               | 1.53                       | 1.27    | 0.26  | -0.05                 | 1.22           | 0.96             |
| <b>Moderately Frail</b>     | 3.26                       | 2.69    | 0.57  | -0.11                 | 2.58           | 0.96             |
| <b>Multiple LTC</b>         | 10.37                      | 8.09    | 2.28  | -0.44                 | 7.66           | 0.95             |
| <b>Severe mental health</b> | 0.60                       | 0.43    | 0.17  | -0.03                 | 0.40           | 0.93             |
| <b>Neuro</b>                | 0.46                       | 0.42    | 0.04  | -0.01                 | 0.41           | 0.98             |
| <b>Dementia</b>             | 0.94                       | 0.86    | 0.09  | -0.02                 | 0.84           | 0.98             |
| <b>LD</b>                   | n/a                        |         | 0.00  | 0.00                  | 0.00           | 1.00             |
| <b>Severe Frail</b>         | 8.13                       | 6.22    | 1.91  | -0.37                 | 5.85           | 0.94             |

**Supplementary Table S12: Observed risk factor levels in 1999 and 2009 by social class [21]**

|                                                  | Professional |       | Managerial<br>and skill non-<br>manual |       | Manual<br>skilled |       | Unskilled<br>manual |       | England |       |
|--------------------------------------------------|--------------|-------|----------------------------------------|-------|-------------------|-------|---------------------|-------|---------|-------|
| Year                                             | 1999         | 2009  | 1999                                   | 2009  | 1999              | 2009  | 1999                | 2009  | 1999    | 2009  |
| <b>Smoking<br/>prevalence,<br/>%</b>             | 13.6         | 8.4   | 22.1                                   | 18.3  | 32.6              | 28.5  | 34.6                | 33.6  | 26.3    | 22.1  |
| <b>Physical<br/>inactivity, %</b>                | 34.7         | 23.9  | 37.1                                   | 33.7  | 38.0              | 37.4  | 38.6                | 39.9  | 37.4    | 34.6  |
| <b>Systolic<br/>blood<br/>pressure,<br/>mmHg</b> | 134.9        | 131.1 | 134.2                                  | 129.9 | 136.2             | 132.8 | 138.5               | 134.2 | 135.3   | 131.2 |
| <b>Cholesterol,<br/>mmol/l</b>                   | 5.48         | 5.41  | 5.49                                   | 5.46  | 5.56              | 5.36  | 5.60                | 5.45  | 5.53    | 5.42  |
| <b>Body mass<br/>index, kg/m<sup>2</sup></b>     | 26.1         | 26.7  | 26.3                                   | 27.2  | 26.7              | 27.5  | 27.0                | 28.0  | 26.3    | 27.2  |

**Supplementary Table S13: Variable definitions for adult risk factors [21]**

| <b>Risk factor HSfE survey</b>    | <b>HSfE survey years</b>       | <b>Description</b>                                        |
|-----------------------------------|--------------------------------|-----------------------------------------------------------|
| <b>Current cigarette smoking</b>  | 1999-2009                      | Self-reported status                                      |
| <b>SBP (mmHg)</b>                 | 1999-2009                      | Mean SBP from 2nd and 3rd reading                         |
| <b>Body Mass Index</b>            | 1999-2009                      | Valid height and weight measurements                      |
| <b>Total cholesterol (mmol/l)</b> | 1999-2009                      | Those reporting taking lipid lowering drugs were included |
| <b>Physical inactivity</b>        | 1999-2004,<br>2006, 2008, 2009 | Low or no activity levels                                 |
| <b>Alcohol consumption</b>        | 2005-2017                      | Self-reported status                                      |

**Supplementary Table S14: Beta coefficients for major risk factors: Systolic blood pressure [33]**

Estimated  $\beta$  coefficients from multiple regression analyses for the relationship between absolute changes in population mean risk factors and percentage changes in coronary heart disease mortality for men and women, stratified by age.

| <b>Systolic Blood pressure</b>           |                  |              |              |              |            |
|------------------------------------------|------------------|--------------|--------------|--------------|------------|
|                                          | <b>Age group</b> |              |              |              |            |
|                                          | <b>25-44</b>     | <b>45-54</b> | <b>55-64</b> | <b>65-74</b> | <b>75+</b> |
| <b>Men (hazard ratio per 20 mmHg)</b>    | 0.49             | 0.49         | 0.52         | 0.58         | 0.65       |
| <b>Men (log hazard ratio per 1 mmHg)</b> | -0.036           | -0.035       | -0.032       | -0.027       | -0.021     |
| <b>Minimum</b>                           | -0.029           | -0.028       | -0.026       | -0.022       | -0.017     |
| <b>Maximum</b>                           | -0.043           | -0.042       | -0.039       | -0.032       | -0.025     |
|                                          |                  |              |              |              |            |
| <b>Men (hazard ratio per 20 mmHg)</b>    | 0.4              | 0.4          | 0.49         | 0.52         | 0.59       |
| <b>Men (log hazard ratio per 1 mmHg)</b> | -0.046           | -0.046       | -0.035       | -0.032       | -0.026     |
| <b>Minimum</b>                           | -0.037           | -0.037       | -0.028       | -0.026       | -0.021     |
| <b>Maximum</b>                           | -0.055           | -0.055       | -0.042       | -0.039       | -0.031     |

**Supplementary Table S15: Beta coefficients for major risk factors: Body mass index [34-35]**

Estimated  $\beta$  coefficients from multiple regression analyses for the relationship between absolute changes in population mean risk factors and percentage changes in coronary heart disease mortality for men and women, stratified by age.

| <b>Body Mass Index (BMI)</b>                                                                    |                  |              |              |              |            |
|-------------------------------------------------------------------------------------------------|------------------|--------------|--------------|--------------|------------|
|                                                                                                 | <b>Age group</b> |              |              |              |            |
|                                                                                                 | <b>&lt;44</b>    | <b>45-59</b> | <b>60-69</b> | <b>70-79</b> | <b>80+</b> |
| <b>Hazard ratio</b>                                                                             | 0.89             | 0.91         | 0.95         | 0.96         | 0.97       |
| <b>Risk reduction per 1kg/m<sup>2</sup></b>                                                     | 0.11             | 0.09         | 0.05         | 0.04         | 0.03       |
| <b>Age gradient (45-59 as reference)</b>                                                        | 1.22             | 1            | 0.56         | 0.44         | 0.33       |
| <b>Relative risks, CHD deaths per 5 BMI units (1kg/m<sup>2</sup>)</b>                           |                  | 1.16         |              |              |            |
| <b>Relative risks, CHD deaths per 1kg/m<sup>2</sup> applying age gradients from James et al</b> | 1.04             | 1.03         | 1.02         | 1.01         | 1.01       |
| <b>Log coefficients</b>                                                                         | 0.0363           | 0.0297       | 0.0165       | 0.0132       | 0.010      |
| <b>Minimum</b>                                                                                  | 0.0255           | 0.0209       | 0.0116       | 0.0093       | 0.007      |
| <b>Maximum</b>                                                                                  | 0.0466           | 0.0381       | 0.0212       | 0.0169       | 0.0127     |



**Supplementary Table S16: Beta coefficients for major risk factors: Cholesterol [36]**

Estimated  $\beta$  coefficients from multiple regression analyses for the relationship between absolute changes in population mean risk factors and percentage changes in coronary heart disease mortality for men and women, stratified by age.

| <b>Cholesterol</b>                      |                  |        |        |        |        |        |
|-----------------------------------------|------------------|--------|--------|--------|--------|--------|
|                                         | <b>Age group</b> |        |        |        |        |        |
|                                         | 25-44            | 45-54  | 55-64  | 65-74  | 75-84  | 85+    |
| <b>Mortality reduction per 1 mmol/l</b> |                  |        |        |        |        |        |
| <b>Men</b>                              | 0.55             | 0.53   | 0.36   | 0.21   | 0.21   | 0.21   |
| <b>Women</b>                            | 0.57             | 0.52   | 0.35   | 0.23   | 0.23   | 0.23   |
| <b>Log coefficient</b>                  |                  |        |        |        |        |        |
| <b>Men</b>                              | -0.799           | -0.755 | -0.446 | -0.236 | -0.117 | -0.083 |
| <b>Minimum</b>                          | -0.639           | -0.604 | -0.357 | -0.189 | -0.093 | -0.067 |
| <b>Maximum</b>                          | -0.958           | -0.906 | -0.536 | -0.283 | -0.140 | -0.100 |
|                                         |                  |        |        |        |        |        |
| <b>Women</b>                            | -0.844           | -0.734 | -0.431 | -0.261 | -0.174 | -0.051 |
| <b>Minimum</b>                          | -0.675           | -0.587 | -0.345 | -0.209 | -0.139 | -0.041 |
| <b>Maximum</b>                          | -1.013           | -0.881 | -0.517 | -0.314 | -0.209 | -0.062 |

**Supplementary Figure S1: Estimation of risk factor changes using regression method.**

*Incidence reduction due to reduction in SBP*  
For example, in 2012, the incidence rate for CHD is 1.6 per 1000 population

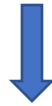

*CHD incidence = expected CHD incidence (had 2012 incidence rates remained constant) × absolute risk factor reduction between 2012 and 2037 × exponential of regression coefficient*

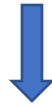

CHD incidence = (1-(exponential (regression coefficient × absolute change))) × expected incidence in 2037

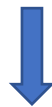

Incidence prevented = (1-(exponential (-0.035 × 9.5))) ≈ 28% × CHD incidence 2012

**Supplementary Figure S2: Estimation of incidence and mortality changes from risk factor changes using the PAF method.**

*CHD Incidence and mortality decrease due to decrease in smoking prevalence*

For example, the prevalence of smoking among the Kent population was 20% in 2012 and is estimated to reduce by 0.4% per year.

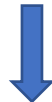

$$PAF = [P \times (RR - 1)] / [1 + P \times (RR - 1)]$$

Where P is the prevalence of the risk factor and RR is the relative risk for incidence associated with risk factor presence.

Assuming a relative risk of 2.69, the PAF at the Kent level for in 2012 was 0.252 and 0.15 in 2037.

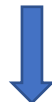

Using estimates of smoking prevalence reduction of 0.4% from 2012 to 2037 prevalence and the same relative risk value of 2.5, a 'risk factor' gradient was calculated using the ratio of the PAF at the Kent level. Therefore:

CHD incidence = expected CHD incidence / mortality rates in 2037 (had 2012 incidence / mortality rates remained constant)  $\times$  (PAF<sub>2012</sub> – PAF<sub>2037</sub>)

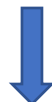

Incidence CHD prevented =  $(0.252 - 0.15) \approx 10.2\% \times$  CHD incidence at 2012

**Supplementary Table S17: Relative risk for underlying risk, incidence and mortality: smoking in adults [37]**

|                   |                           |       | Men     |      | Women   |      | Both    |      |
|-------------------|---------------------------|-------|---------|------|---------|------|---------|------|
|                   |                           | Age   | Current | Ex   | Current | Ex   | Current | Ex   |
| Cancers           | lung                      | 35+   | 23.26   | 8.70 | 12.69   | 4.53 | 17.98   | 6.62 |
|                   | upper respiratory         | 35+   | 10.89   | 3.40 | 5.08    | 2.29 | 7.99    | 2.85 |
|                   | oesophagus                | 35+   | 6.76    | 4.46 | 7.75    | 2.79 | 7.26    | 3.63 |
|                   | larynx                    | 35+   | 14.60   | 6.34 | 13.02   | 5.16 | 13.81   | 5.75 |
|                   | cervical                  | 35+   | 1.00    | 1.00 | 1.59    | 1.14 | 1.30    | 1.07 |
|                   | bladder                   | 35+   | 3.27    | 2.09 | 2.22    | 1.89 | 2.75    | 1.99 |
|                   | kidney and renal pelvis   | 35+   | 2.50    | 1.70 | 1.40    | 1.10 | 1.95    | 1.40 |
|                   | stomach                   | 35+   | 1.96    | 1.47 | 1.36    | 1.32 | 1.66    | 1.40 |
|                   | pancreas                  | 35+   | 2.31    | 1.15 | 2.25    | 1.55 | 2.28    | 1.35 |
|                   | unspecified               | 35+   | 4.40    | 2.50 | 2.20    | 1.30 | 3.30    | 1.90 |
|                   | myeloid leukaemia         | 35+   | 1.80    | 1.40 | 1.20    | 1.30 | 1.50    | 1.35 |
| Respiratory       | COPD*                     | 35+   |         |      |         |      | 6.50    | 3.00 |
|                   | Chronic airways disease   | 35+   | 10.58   | 6.80 | 13.08   | 6.78 | 11.83   | 6.79 |
|                   | Pneumonia                 | 35-64 | 2.50    | 1.40 | 4.30    | 1.10 | 3.40    | 1.25 |
|                   | Pneumonia                 | 65+   | 2.00    | 1.40 | 2.20    | 1.10 | 2.10    | 1.25 |
|                   | Pneumonia                 | 35+   | 2.25    | 1.40 | 3.25    | 1.10 | 2.75    | 1.25 |
| Circulatory       | Other Heart               |       | 1.78    | 1.22 | 1.49    | 1.14 | 1.64    | 1.18 |
|                   | CHD                       | 35+   | 2.48    | 1.50 | 2.90    | 1.53 | 2.69    | 1.51 |
|                   | Other arterial            | 35+   | 2.07    | 1.01 | 2.17    | 1.12 | 2.12    | 1.07 |
|                   | Stroke                    | 35-54 | 4.40    | 1.10 | 5.40    | 1.30 | 4.90    | 1.20 |
|                   | Stroke                    | 55-64 | 3.10    | 1.10 | 3.70    | 1.30 | 3.40    | 1.20 |
|                   | Stroke                    | 65-74 | 2.20    | 1.10 | 2.60    | 1.30 | 2.40    | 1.20 |
|                   | Stroke                    | 75+   | 1.60    | 1.10 | 1.30    | 1.00 | 1.45    | 1.05 |
|                   | Stroke                    | 35+   | 2.83    | 1.10 | 3.25    | 1.23 | 3.04    | 1.16 |
|                   | aortic aneurism           | 35+   | 6.20    | 3.07 | 7.07    | 2.07 | 6.64    | 2.57 |
|                   | Atherosclerosis           | 35+   | 2.44    | 1.33 | 1.83    | 1.00 | 2.14    | 1.17 |
| Digestive disease | Stomach ulcer             | 35+   | 5.40    | 1.80 | 5.50    | 1.40 | 5.45    | 1.60 |
|                   | Crohn's disease           | 35+   | 2.10    | 1.00 | 2.10    | 1.00 | 2.10    | 1.00 |
|                   | Periodontal/Periodontitis | 35+   | 3.97    | 1.68 | 3.97    | 1.68 | 3.97    | 1.68 |
| Total death rate  |                           |       |         |      |         |      | 3.84    | 1.43 |

**Supplementary Table S18: Relative risk for underlying risk, incidence and mortality: physical inactivity in adults [38-39]**

Relative risk of Coronary Heart Disease, Stroke and Diabetes from physical (in)activity levels from WHO GBD Study, relative to those considered physically active

|              | <b>CHD</b>      |                     | <b>Stroke</b>   |                     | <b>Diabetes</b> |                     |
|--------------|-----------------|---------------------|-----------------|---------------------|-----------------|---------------------|
| <b>Age</b>   | <b>Inactive</b> | <b>Insufficient</b> | <b>Inactive</b> | <b>Insufficient</b> | <b>Inactive</b> | <b>Insufficient</b> |
| <b>15-69</b> | 1.71            | 1.44                | 1.53            | 1.1                 | 1.45            | 1.24                |
| <b>70-79</b> | 1.5             | 1.31                | 1.38            | 1.08                | 1.32            | 1.18                |
| <b>80+</b>   | 1.3             | 1.2                 | 1.24            | 1.05                | 1.20            | 1.11                |

Physical (in)activity in the WHO GBD study was treated as a categorical variable with three categories: Level 1: Inactive: 'doing no or very little physical activity at work, at home, for transport, or during discretionary time'. Level 2: Insufficiently active: 'doing some physical activity but less than 150 minutes of moderate-intensity physical activity or 60 minutes of vigorous-intensity physical activity a week accumulated across work, home, transport or discretionary domains'. Level 3: Sufficiently active (unexposed): 'at least 150 minutes of moderate-intensity physical activity or 60 minutes of vigorous-intensity physical activity a week accumulated across work, home, transport or discretionary domains', which approximately corresponds to current recommendations in many countries.

**Supplementary Table S19: Relative risk for underlying risk, incidence and mortality: obesity and overweight in adults [40-41]**

*Relative risk of Coronary Heart Disease, Stroke Hypertension and Diabetes from overweight and obesity levels from WHO GBD Study, relative to those considered physically active*

|                     | Overweight |         | Obese    |         |
|---------------------|------------|---------|----------|---------|
|                     | under 65   | over 65 | under 65 | over 65 |
| <b>CHD</b>          | 1.38       | 1.00    | 1.90     | 1.23    |
| <b>Stroke</b>       | 1.30       | 1.00    | 1.55     | 1.18    |
| <b>Hypertension</b> | 1.40       | 1.40    | 2.35     | 2.35    |
| <b>Diabetes</b>     | 1.80       |         | 8.95     |         |

**Supplementary Table S20: Relative risk for underlying risk, incidence and mortality: dementia in adults [42]**

| Age                  | Risk factor         | RR  |
|----------------------|---------------------|-----|
| Early life (<18 yrs) | Less education      | 1.6 |
| Midlife (45-65 yrs)  | Hypertension        | 1.6 |
|                      | Obesity             | 1.6 |
|                      | Hearing loss        | 1.9 |
| Late life (age > 65) | Smoking             | 1.6 |
|                      | Depression          | 1.9 |
|                      | Physical inactivity | 1.4 |
|                      | Social isolation    | 1.6 |
|                      | Diabetes            | 1.5 |

**Supplementary Table S21: Relative risk for underlying risk, incidence and mortality:  
Hypertension and Hypercholesterolaemia in adults [43]**

Relative risk for CHD and stroke

|                         | <b>CHD</b> | <b>Stroke</b> |
|-------------------------|------------|---------------|
| <b>Hypertension</b>     | 2.86       | 5.08          |
| <b>High cholesterol</b> | 3.00       | 1.50          |



**Supplementary Table S22: Relative risk reduction for CHD and stroke [43]**

| Age group<br>(years) | Relative risk 10mmHg decrease |        | Relative risk 1mmol/l decrease |        |
|----------------------|-------------------------------|--------|--------------------------------|--------|
|                      | CHD                           | Stroke | CHD                            | Stroke |
| <b>30-44</b>         | 0.52                          | 0.42   | 0.51                           | 0.66   |
| <b>45-59</b>         | 0.60                          | 0.50   | 0.50                           | 0.66   |
| <b>60-69</b>         | 0.75                          | 0.64   | 0.70                           | 0.77   |
| <b>70-79</b>         | 0.80                          | 0.72   | 0.77                           | 0.92   |
| <b>80+</b>           | 0.94                          | 0.83   | 0.75                           | 0.84   |

**Supplementary Table S23: Relative risk for underlying risk, incidence and mortality: Alcohol consumption in adults**

| Category                                            | Disease or injury                                                 | ICD-10 codes               | Source for risk function | Low | Hazardous | Harmful |
|-----------------------------------------------------|-------------------------------------------------------------------|----------------------------|--------------------------|-----|-----------|---------|
| <i>Wholly attributable to alcohol, chronic (10)</i> | Alcohol-induced pseudo-Cushing's syndrome                         | E24.4                      | NA                       | NA  | NA        | NA      |
|                                                     | Degeneration of nervous system due to alcohol                     | G31.2                      | NA                       | NA  | NA        | NA      |
|                                                     | Alcoholic polyneuropathy                                          | G62.1                      | NA                       | NA  | NA        | NA      |
|                                                     | Alcoholic myopathy                                                | G72.1                      | NA                       | NA  | NA        | NA      |
|                                                     | Alcoholic cardiomyopathy                                          | I42.6                      | NA                       | NA  | NA        | NA      |
|                                                     | Alcoholic gastritis                                               | K29.2                      | NA                       | NA  | NA        | NA      |
|                                                     | Alcoholic liver disease                                           | K70.0-K70.4, K70.9         | NA                       | NA  | NA        | NA      |
|                                                     | Acute pancreatitis (alcohol induced)                              | K85.2                      | NA                       | NA  | NA        | NA      |
|                                                     | Chronic pancreatitis (alcohol induced)                            | K86.0                      | NA                       | NA  | NA        | NA      |
|                                                     | Maternal care for (suspected) damage to foetus from alcohol       | O35.4                      | NA                       | NA  | NA        | NA      |
| <i>Wholly attributable to alcohol, acute (7)</i>    | Mental and behavioural disorders due to use of alcohol            | F10                        | NA                       | NA  | NA        | NA      |
|                                                     | Excessive Blood Level of Alcohol                                  | R78.0                      | NA                       | NA  | NA        | NA      |
|                                                     | Toxic effect of alcohol                                           | T51.0, T51.1, T51.8, T51.9 | NA                       | NA  | NA        | NA      |
|                                                     | Accidental poisoning by exposure to alcohol                       | X45                        | NA                       | NA  | NA        | NA      |
|                                                     | Intentional self-poisoning by and exposure to alcohol             | X65                        | NA                       | NA  | NA        | NA      |
|                                                     | Poisoning by and exposure to alcohol, undetermined intent         | Y15                        | NA                       | NA  | NA        | NA      |
|                                                     | Evidence of alcohol involvement determined by blood alcohol level | Y90                        | NA                       | NA  | NA        | NA      |

|                                                     |                                                               |                           |    |      |      |       |
|-----------------------------------------------------|---------------------------------------------------------------|---------------------------|----|------|------|-------|
| <i>Partially attributable to alcohol, chronic</i>   | Malignant neoplasm of lip, oral cavity and pharynx            | NA                        | NA | 1.65 | 3.11 | 6.45  |
|                                                     | Malignant neoplasm of oesophagus                              | NA                        | NA | 1.30 | 1.93 | 3.59  |
|                                                     | Malignant neoplasm of colon                                   | NA                        | NA | 1.04 | 1.10 | 1.21  |
|                                                     | Malignant neoplasm of rectum                                  | NA                        | NA | 1.07 | 1.19 | 1.42  |
|                                                     | Malignant neoplasm of liver and intrahepatic bile ducts       | NA                        | NA | 1.15 | 1.40 | 1.81  |
|                                                     | Malignant neoplasm of larynx                                  | NA                        | NA | 1.33 | 2.02 | 3.86  |
|                                                     | Malignant neoplasm of ] breast                                | NA                        | NA | 1.14 | 1.35 | NA    |
|                                                     | Diabetes mellitus (type II)                                   | NA                        | NA | 0.93 | 0.85 | 0.73  |
|                                                     | Epilepsy and Status epilepticus                               | NA                        | NA | 3.26 | 7.52 | 6.83  |
|                                                     | Hypertensive diseases                                         | NA                        | NA | 1.29 | 2.04 | 4.15  |
|                                                     | Ischaemic heart disease                                       | NA                        | NA | 0.86 | 1.04 | 1.53  |
|                                                     | Cardiac arrhythmias                                           | NA                        | NA | 1.75 | 2.23 | 2.23  |
|                                                     | Haemorrhagic stroke                                           | NA                        | NA | 1.15 | 1.82 | 4.70  |
|                                                     | Ischaemic stroke                                              | NA                        | NA | 0.88 | 1.17 | 4.37  |
|                                                     | Oesophageal varices                                           | NA                        | NA | 2.43 | 7.13 | 26.53 |
|                                                     | Unspecified liver disease                                     | NA                        | NA | 2.43 | 7.13 | 26.53 |
|                                                     | Cholelithiasis                                                | NA                        | NA | 0.77 | 0.59 | 0.50  |
|                                                     | Acute and chronic pancreatitis                                | NA                        | NA | 1.23 | 1.78 | 3.19  |
| <i>Partially attributable to alcohol, acute (9)</i> | Transport injuries (including road traffic accidents)         | V01-V98, Y85.0            |    | NA   | NA   | NA    |
|                                                     | Fall injuries                                                 | W00-W19                   |    | NA   | NA   | NA    |
|                                                     | Exposure to mechanical forces (including machinery accidents) | W20-W52                   |    | NA   | NA   | NA    |
|                                                     | Drowning                                                      | W65-W74                   |    | NA   | NA   | NA    |
|                                                     | Other Unintentional Injuries                                  | W75-W99, X30-X33, X50-X58 |    | NA   | NA   | NA    |

|  |                                                        |                                |  |    |    |    |
|--|--------------------------------------------------------|--------------------------------|--|----|----|----|
|  | Accidental poisoning by exposure to noxious substances | X40-X49<br>excl. X45           |  | NA | NA | NA |
|  | Intentional self-harm                                  | X60-X84,<br>Y87.0<br>excl. X65 |  | NA | NA | NA |
|  | Assault                                                | X85-Y09,<br>Y87.1              |  | NA | NA | NA |
|  | Other intentional injuries                             | Y35                            |  | NA | NA | NA |

**Supplementary Figure S3: Casual Loop Diagram (CLD)**

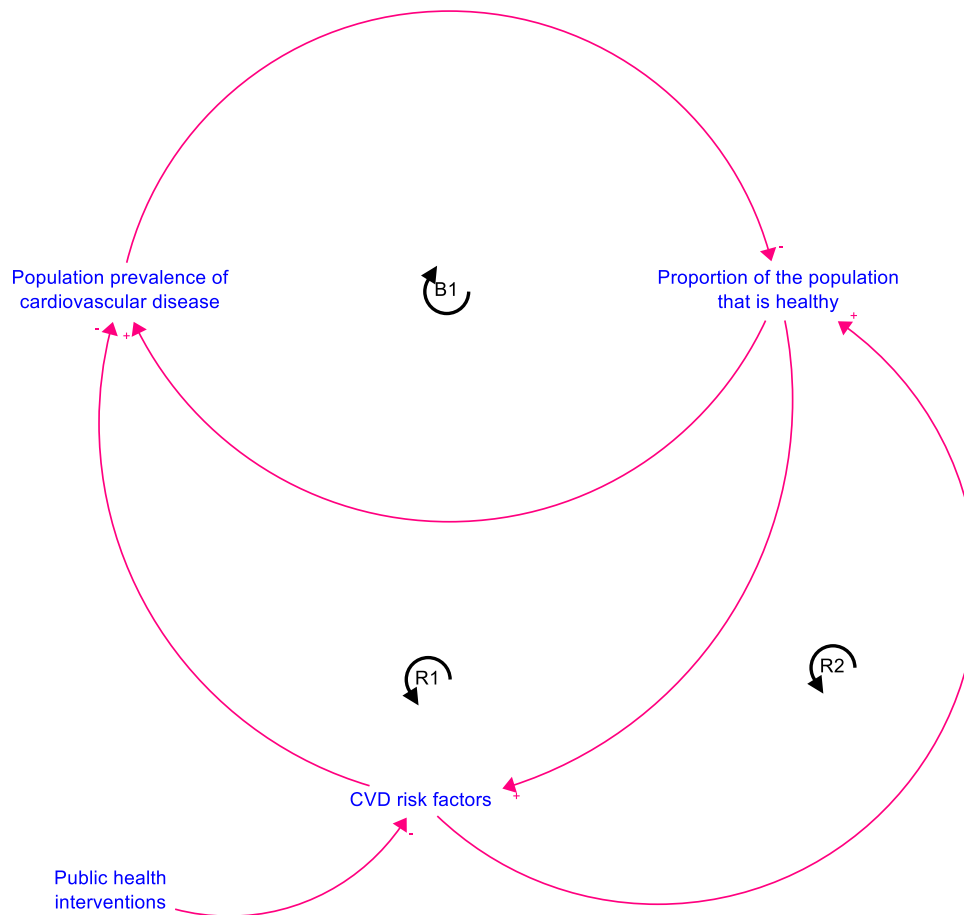

**Explanation for causal loop diagram example:**

1. If the population prevalence of CVD increases (as a result of ageing), then the proportion of the population that is healthy goes down, which reduces the potential for further increases in CVD – this is B1 a balancing loop.
2. If the proportion of the population that is healthy goes down the prevalence of CVD risk factors goes up, which means that the population prevalence of CVD also goes up and, as above the proportion of the population that is healthy goes down – this is a negative reinforcing loop R1 that could tend toward escalating levels of CVD, tempered by B1, i.e. it will not grow exponentially for ever due to the natural limit of population size.
3. The introduction of public health interventions on CVD risk factors is designed to reduce the prevalence of risk factors, which increases the proportion of the population that is healthy and feeds back in a positive reinforcing loop R2 that will compete with the negative reinforcing look R1, which itself is being dampened by the balancing loop B1.

This complex relationship of competing feedback is at the heart of the model and is replicated for overlapping conditions and public health interventions.

#### Supplementary Figure S4: Relative deviation [47]

Two performance indicators were used to evaluate model validation against collected surveillance data or externally modelled data. These calculations for these are outlined below.

The relative deviation rate illustrates the deviation between the simulated and actual output.

$$E_r = \left| \frac{V_{sim} - V_{act}}{V_{act}} \right| \times 100\%$$

Where:

- $E_r$  is the relative deviation rate
- $V_{sim}$  is the simulated value
- $V_{act}$  is the actual value

The average relative deviation rate summarises the deviation between the simulated and actual output.

$$E_r = \left| \frac{V_{sim} - V_{act}}{V_{act}} \right|_{ave} \times 100\%$$

Where:

- $E_r$  is the relative deviation rate
- $V_{sim}$  is the simulated value
- $V_{act}$  is the actual value

**Supplementary Table S24: Single prevalence validation through relative deviation rates[45]**

| Variable | Value            | 2012  | 2013  | 2014  | 2015  | 2016  | 2017  | 2018  | 2019  | 2020  | 2021   |
|----------|------------------|-------|-------|-------|-------|-------|-------|-------|-------|-------|--------|
| CHD      | Simulation value | 3.18% | 3.17% | 3.17% | 3.15% | 3.13% | 3.10% | 3.06% | 3.02% | 2.98% | 2.93%  |
|          | Actual Value     | 3.14% | 3.08% | 3.03% | 3.01% | 2.95% | 2.93% | 2.91% | 2.89% | 2.85% | 2.83%  |
|          | <i>Er</i>        | 1.24% | 2.99% | 4.55% | 4.79% | 6.04% | 5.82% | 5.21% | 4.32% | 4.44% | 3.38%  |
|          | <i>Eave</i>      |       |       |       |       | 4.28% |       |       |       |       |        |
| COPD     | Simulation value | 1.91% | 1.92% | 1.93% | 1.93% | 1.93% | 1.93% | 1.93% | 1.93% | 1.92% | 1.91%  |
|          | Actual Value     | 1.75% | 1.80% | 1.86% | 1.93% | 1.97% | 2.00% | 2.05% | 2.05% | 2.05% | 2.01%  |
|          | <i>Er</i>        | 9.57% | 6.56% | 3.60% | 0.01% | 2.03% | 3.49% | 6.01% | 6.21% | 6.30% | 4.62%  |
|          | <i>Eave</i>      |       |       |       |       | 4.84% |       |       |       |       |        |
| Diabetes | Simulation value | 4.80% | 4.88% | 4.95% | 5.01% | 5.08% | 5.13% | 5.18% | 5.24% | 5.28% | 5.30%  |
|          | Actual Value     | 4.89% | 4.99% | 5.04% | 5.16% | 5.30% | 5.38% | 5.52% | 5.58% | 5.62% | 5.81%  |
|          | <i>Er</i>        | 1.76% | 2.33% | 1.72% | 2.94% | 4.28% | 4.69% | 6.16% | 6.14% | 6.07% | 8.83%  |
|          | <i>Eave</i>      |       |       |       |       | 4.49% |       |       |       |       |        |
| Stroke   | Simulation value | 1.69% | 1.69% | 1.70% | 1.69% | 1.69% | 1.67% | 1.66% | 1.65% | 1.63% | 1.61%  |
|          | Actual Value     | 1.70% | 1.71% | 1.71% | 1.71% | 1.71% | 1.73% | 1.74% | 1.76% | 1.77% | 1.80%  |
|          | <i>Er</i>        | 0.79% | 1.12% | 0.67% | 1.03% | 1.47% | 3.45% | 4.43% | 6.62% | 7.82% | 10.35% |
|          | <i>Eave</i>      |       |       |       |       | 3.77% |       |       |       |       |        |

**Supplementary Table S25: Population validation through relative deviation rates [48]**

| Variable         | Value            | 2012     | 2013     | 2014     | 2015     | 2016     | 2017     | 2018     | 2019     | 2020     | 2021     |
|------------------|------------------|----------|----------|----------|----------|----------|----------|----------|----------|----------|----------|
| Population total | Simulation value | 1465197  | 1480428  | 1496972  | 1513996  | 1530433  | 1546948  | 1562687  | 1580082  | 1601037  | 1622480  |
|                  | Actual Value     | 1465381  | 1479078  | 1492417  | 1509263  | 1523618  | 1540186  | 1556241  | 1571427  | 1590920  | 1613357  |
|                  | <i>Er</i>        | 0.01%    | 0.09%    | 0.31%    | 0.31%    | 0.45%    | 0.44%    | 0.41%    | 0.55%    | 0.64%    | 0.57%    |
|                  | <i>Eave</i>      |          |          |          |          | 0.38%    |          |          |          |          |          |
| Population 0-17  | Simulation value | 323284.6 | 326147.5 | 329101.4 | 332172.9 | 335291.9 | 338355.6 | 341514.7 | 345096.7 | 349277.9 | 353601.2 |
|                  | Actual Value     | 323468.8 | 324997.4 | 326758.4 | 328990.8 | 331108   | 333166.2 | 335761.1 | 339179.3 | 343712.5 | 349441.6 |
|                  | <i>Er</i>        | 0.06%    | 0.35%    | 0.72%    | 0.97%    | 1.26%    | 1.56%    | 1.71%    | 1.74%    | 1.62%    | 1.19%    |
|                  | <i>Eave</i>      |          |          |          |          | 1.12%    |          |          |          |          |          |
| Population 18+   | Simulation value | 1141913  | 1154280  | 1167871  | 1181823  | 1195141  | 1208593  | 1221172  | 1234985  | 1251759  | 1268879  |
|                  | Actual Value     | 1141913  | 1154080  | 1165659  | 1180272  | 1192510  | 1207019  | 1220480  | 1232248  | 1247208  | 1263916  |
|                  | <i>Er</i>        | 0.00%    | 0.02%    | 0.19%    | 0.13%    | 0.22%    | 0.13%    | 0.06%    | 0.22%    | 0.36%    | 0.39%    |
|                  | <i>Eave</i>      |          |          |          |          | 0.17%    |          |          |          |          |          |



**Supplementary Figure S5: Visual single prevalence model validation [45]**

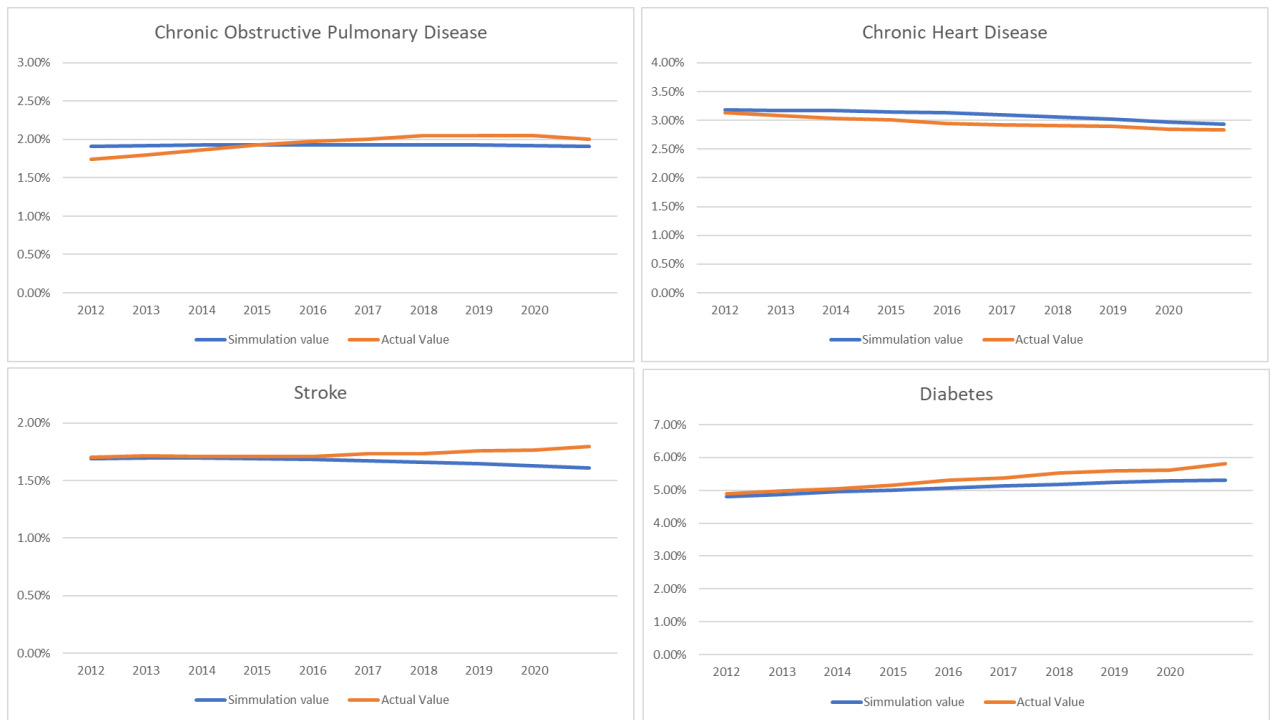

**Supplementary Figure S6: Visual population model validation [48]**

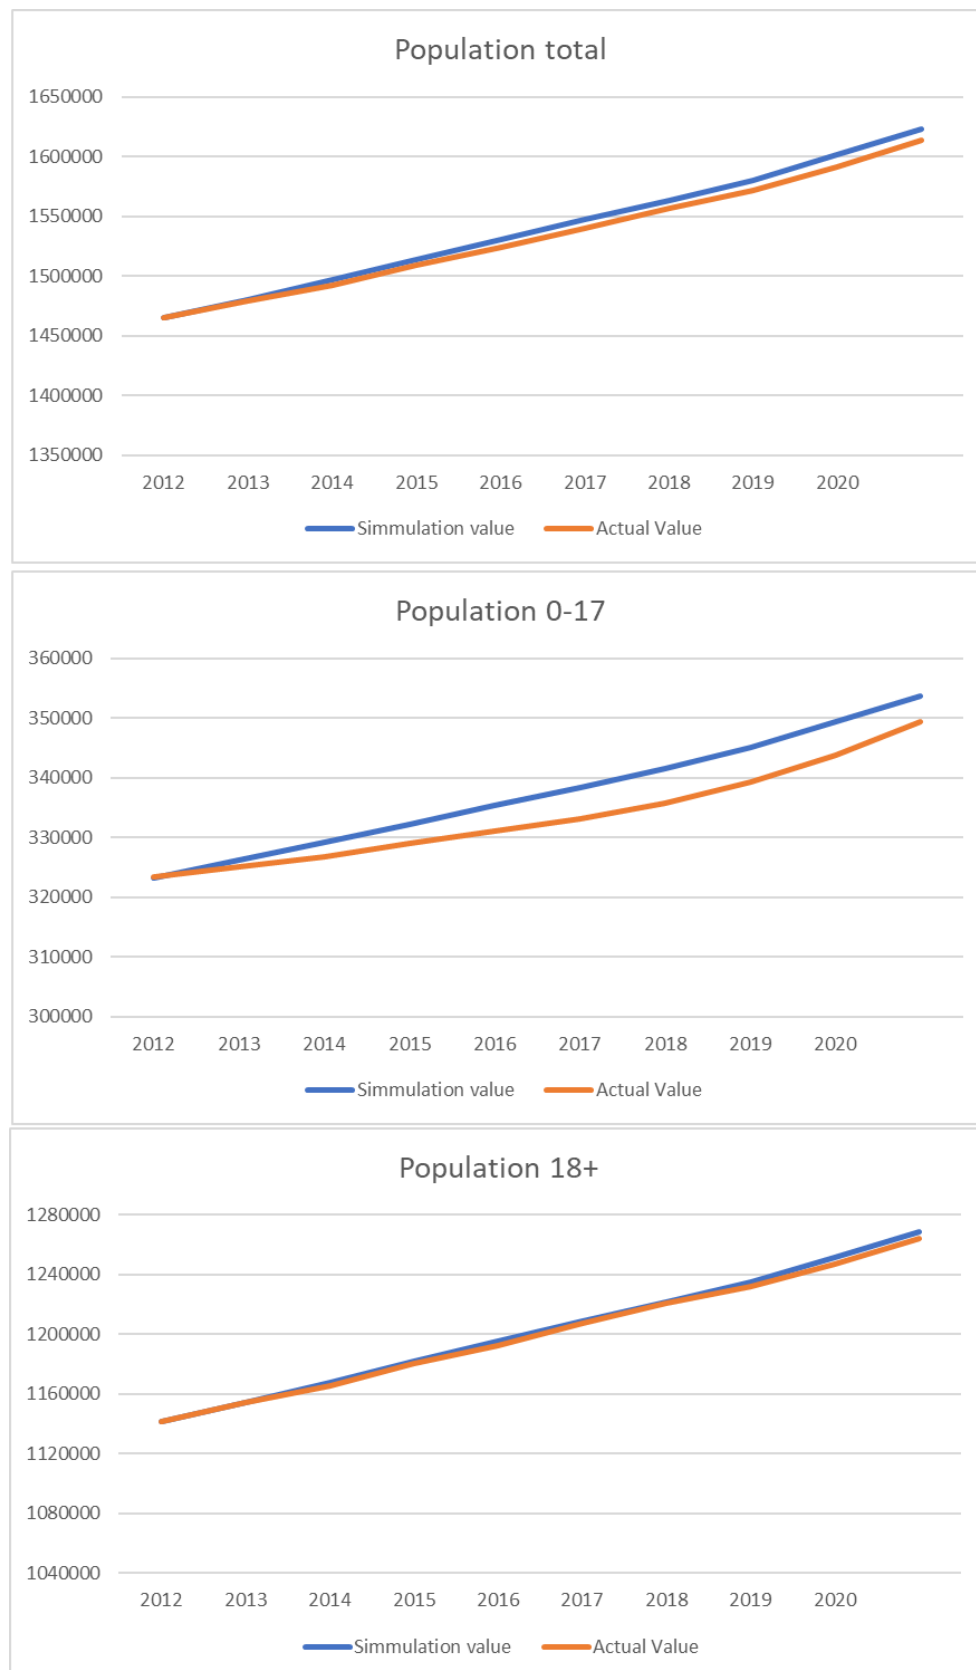

**Supplementary Table S26: Sensitivity analysis testing ranges**

| <b>Variable</b>                                 | <b>Lower</b> | <b>Mean</b> | <b>Upper</b> |
|-------------------------------------------------|--------------|-------------|--------------|
| <b>Smoking prevalence</b>                       | -0.6%        | -0.3%       | 0.0%         |
| <b>Obesity prevalence</b>                       | 0.0%         | 0.3%        | 0.5%         |
| <b>Annual Systolic Blood Pressure reduction</b> | -0.4%        | -0.2%       | 0.0%         |
| <b>Annual total cholesterol reduction</b>       | -0.04%       | 0.0%        | 0.0%         |

**Supplementary Figure S7: Sensitivity analysis variation for Healthy Life Expectancy (HLE) at 18**

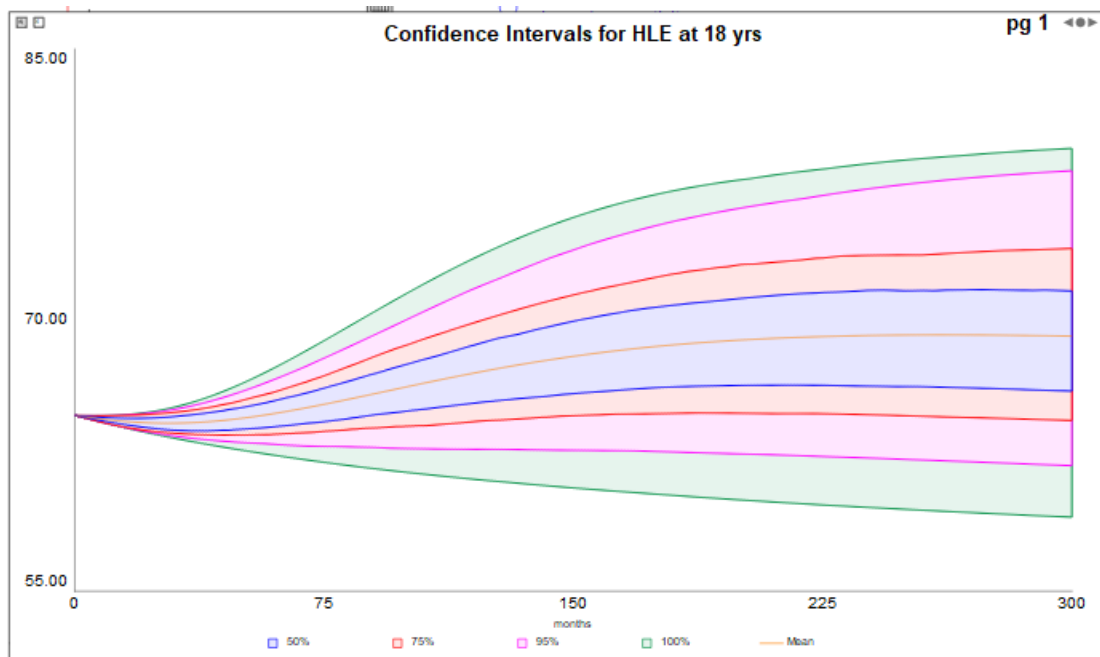

**Supplementary Table S27: Relative risk for underlying risk, incidence: breastfeeding, smoking in pregnancy, child obesity, fuel poverty and ACE in Children and Young People [51-54]**

| Risk                     | Cohort / condition    | Relative Risk | Age group affected  |
|--------------------------|-----------------------|---------------|---------------------|
| Breastfeeding            | Asthma                | 0.91          | 5-19 yrs            |
|                          | Admission respiratory | 0.43          | <2 yrs              |
|                          | Overweight and obese  | 0.74          | Child adol & adults |
|                          | Blood pressure        | 0.5           | Child adol & adults |
|                          | Diabetes              | 0.65          | Child adol & adults |
| Smoking during pregnancy | Stillbirth            | 1.49          | At birth            |
|                          | ADHD                  | 2.39          | Child, ad           |
|                          | Conduct Disorder      | 2.6           | 16-18               |
|                          | Substance misuse      | 2.4           | 16-18               |
|                          | Depression            | 1.4           | 16-18               |
|                          | Overweight            | 1.5           | Child, ad           |

#### Fuel Poverty

Children living in cold and damp housing are 1.5-3 times more likely to suffer from Asthma and respiratory diseases [55]. A child who develops asthma in this way is more likely to persist into adulthood and to possibly life [56].

#### Adverse Childhood Experience (ACE)

ACEs are, as the name implies, experiences that adversely affect children.

The evidence cites issues commonly categorised as ACEs. This is not necessarily an exclusive list. In part based on the CDC ACE questions - refer to the respondent's first 18 years of life.

#### Five Direct

- Sexual abuse by parent / caregiver.
- Emotional abuse by parent / caregiver.
- Physical abuse by parent / caregiver.
- Emotional neglect by parent / caregiver.
- Physical neglect by parent / caregiver.

#### Five Indirect

- Parent / Caregiver addicted to alcohol / other drugs.
- Witnessed abuse in the household
- Family member in prison
- Family member with a mental illness.
- Parent / Caregiver disappeared through abandoning family / divorce.

Some surveys also include mother treated violently

In this high-risk population, the rate of childhood mental health problems is 3 times higher than children without these risk factors.

The rate of adults diagnosed with chronic diseases was more than twice as high as that of adults with no ACEs, and more than four times higher for type 2 diabetes. Compared with people with no ACEs, those with four or more were [57]

- 9.5 times more likely to currently be receiving treatment for mental illness
- 6.1times more likely to have ever received treatment for mental illness
- 3.7 times more likely to have ever felt suicidal or self-harmed

**Supplementary Figure S8: Estimation of incidence and mortality changes from a specific treatment**

*Incidence fall in STROKE patients as a result of taking BP lowering drugs*

For example, in England in 2012, about 30% of the population had hypertension. 40% of these were assumed to already be receiving blood pressure lowering drugs.

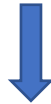

The relative risk of stroke from hypertension is 5.01 and the risk reduction from reducing blood pressure by 10mmHg is 0.6. The incidence and deaths prevented for at least a year were therefore calculated as:

***PAF for hypertension × percent increased treatment × relative reduction × one year incidence***

$= 58\% \times 30\% \times (100-60)\% \approx 7.7\% \times \text{stroke incidence / mortality}$

### Supplementary Figure S9: Estimation of incidence changes from fuel poverty changes

*Incidence physical transient patients as a result of fuel poverty changes for CYP*

For example, in Kent in 2010, about 17% of the child population were fuel poor (using the Income Deprivation Affecting Children Index).

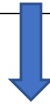

The relative risk of respiratory incidence from fuel poverty is 3. The incidence prevented for at least a year were therefore calculated as:

***$(1 - (\text{PAF for fuel poverty (respiratory)} \times \text{percent change in fuel poverty})) \times \text{one year incidence}$***

$= (1 - (0.25 \times 25\%)) \approx 0.93 \times \text{physical transient incidence / mortality}$

This calculation is adjusted over time to achieve a reduction over a set time period. The current time period is 2018 to 2025.



### Supplementary Figure S10: Cumulative risk-reduction

Combined (or cumulative) effect (CR) =  $1 - ((1-a) \times (1-b) \times (1-c) \times \dots \times (1-n))$  [1]

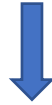

Thus for CHD risk factors, the specific equation is stated as:  
 $CR = 1 - ((1-R_{SBP}) \times (1-R_{smoke}) \times (1-R_{cholesterol}) \times \dots \times (1-R_n))$   
where R denotes the incidence or mortality change attributable to a specific risk factor.

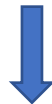

This is in contrast to additive risk-reduction (AR):  
 $AR = (R_{SBP}) + (R_{smoke}) + (R_{diabetes}) + \dots + (R_n)$  [2]

**Supplementary Figure S11: Proportional change in cohort incidence and mortality rate over time**

Proportional change in cohort incidence and mortality rate over time (denoted by R)

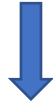

$$PAF = [P \times (RR - 1)] / [1 + P \times (RR - 1)]$$

and P denotes prevalence at the start-year; RR the relative risk in cohort incidence or mortality associated with risk factor presence; and  $\Delta P$  the change in prevalence between the start and final years (Ezatti et al., 2004).

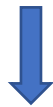

Continuous risk factors:

$$R_{\text{continuous}} = 1 - \exp(\text{beta} \times \text{absolute mean risk factor change}) \quad [3]$$

Dichotomous risk factors:

$$R_{\text{dichotomous}} = PAF \times (\Delta P / P) \quad [4]$$
