# Supplementary material for: Use of System Dynamics Modelling for Evidence-Based Decision Making in Public Health Practice
Source: MDPI journal article supplement (doi:10.3390/systems11050247), 2023-05-14
Supplement: s1 [file s1]

Archive with 1 entries (1 files):
- systems-2329887-supplementary.pdf
